# Supplementary material
Source: Royal Society of Chemistry journal article supplement (doi:10.1039/d6mh00024j)
Supplement: d6mh00024j1.pdf [file d6mh00024j1.pdf]

## Supporting Information

# **A General Structural Decoupling Strategy Toward Ultra-Long Blue Circularly Polarized Room-Temperature Phosphorescence**

Linmin Zou<sup>1</sup>, Yudie Shan<sup>1</sup>, Tiantian Miao<sup>1</sup>, Zixuan Sun<sup>1</sup>, Yinyin Zhu<sup>1</sup>, Dan Ning<sup>1</sup>,  
Yongyang Gong<sup>1\*</sup>, Chuanbai Yu<sup>1\*</sup> and Wang Zhang Yuan<sup>2\*</sup>

<sup>1</sup> Guangxi Key Laboratory of Optical and Electronic Materials and Devices, Guangxi Colleges and Universities Key Laboratory of Natural and Biomedical Polymer Materials, College of Materials Science and Engineering, Guilin University of Technology, No.12 Jian'gan Rd., Qixing District, Guilin 541004, P. R. China.

Email: [ycb2008@glut.edu.cn](mailto:ycb2008@glut.edu.cn) and [yygong@glut.edu.cn](mailto:yygong@glut.edu.cn)

<sup>2</sup> State Key Laboratory of Synergistic Chem-Bio Synthesis, Frontiers Science Center for Transformative Molecules, School of Chemistry and Chemical Engineering, Shanghai Jiao Tong University, No. 800 Dongchuan Rd., Minhang District, Shanghai 200240, China.

Email: [wzhyuan@sjtu.edu.cn](mailto:wzhyuan@sjtu.edu.cn)

## EXPERIMENTAL SECTION

### Reagents and materials

4-Biphenylcarboxylic acid (BPCA), 4-biphenylacetic acid (BPAA), and L/D-4,4'-biphenylalanine (D/L-BPAla) were purchased from Adamas Reagent Ltd (commercially available), all samples underwent purification and spectroscopic characterization prior to optical property measurements. Polyvinyl alcohol (PVA), hydrochloric acid (HCl), acetonitrile (AN), and tetrahydrofuran (THF) were purchased from Adamas Reagent Ltd. Ultrapure water was prepared using an Asura AXLM1820 water purification system.

### Measurements

Nuclear magnetic resonance ( $^1\text{H}$  NMR and  $^{13}\text{C}$  NMR) spectra were tested on the Bruker AVANCE III HD-500 spectrometer or Bruker Magnet System 400' 54 Ascend. The chemical shifts in  $^1\text{H}$  NMR spectra are reported using tetramethyl silane as a standard, and those in  $^{13}\text{C}$  NMR spectra are reported using the solvent signals as a standard. Data for both high-performance liquid chromatography (HPLC) and high-resolution mass spectrometry (HRMS) was generated using a Waters ultra-performance liquid chromatography-quadrupole time-of-flight mass spectrometer, model Acquity 2D-UPLC/Xevo G2-XS QTOF. Ultraviolet spectrum obtained via PerkinElmer Instruments Lambda 365 in the United States. Fluorescent spectra, phosphorescent spectra and time attenuation curves were tested on Horiba Jobin Yvon QM-8000, and Absolute quantum yields were measured on an Edinburgh FLS1000 fluorescence spectrophotometer equipped with a continuous xenon lamp. Circular Dichroism

spectrum and circularly polarized luminescence spectrum obtained on Jasco J-1500 circular dichroism spectrophotometer and Jasco CPL-300 circularly polarized luminescence spectrophotometer, respectively.

### **Preparation of polymer-based films**

**Doping D/L-BPAIa PVA films:** Dissolve 15 g of PVA in 150 mL of deionized water at 60° C to prepare a 10% PVA aqueous solution. Dissolve the organic chromophore (1.0 mg) in water (10 mL), add a drop of HCl, heating and stirring 15 min. Then add 5 mL chromophore solution (0.1 mg/mL) into 5 mL of the aforementioned 10% PVA aqueous solution. Thoroughly mix the mixture at 60° C to obtain a transparent solution, pour it into a plastic petri dish (60 mm in diameter), cover with a lid, and dry in an oven at 80° C to obtain a high-transparency phosphorescent film.

**Doping BPAA and BPCA PVA films:** Dissolve 15 g of PVA in 150 mL of deionized water at 60° C to prepare a 10% PVA aqueous solution. Dissolve the organic chromophore (5.0 mg) in THF (10 mL), stirring 15 min. Then add 5 mL of the aforementioned 10% PVA aqueous solution. Thoroughly mix the mixture at 60° C to obtain a transparent solution, pour it into a plastic petri dish (60 mm in diameter), cover with a lid, and dry in an oven at 80°C to obtain a high-transparency phosphorescent film.

**Co-doping PVA films:** Dissolve 1 mg of Rhodamine 6g (R6g) in 10 mL of water. Dissolve the guest molecule (**D/L-BPAIa**) (1 mg) in 10 mL of water, add a drop of HCl, heating and stirring 15 min. Then add 0.25 mL of the R6g aqueous solution (0.1 mg/mL) and 5 mL of the PVA aqueous solution into the 5 mL guest molecule solution.

Thoroughly mix the mixture at 60° C to obtain a transparent solution. Pour the solution into a plastic petri dish (60 mm in diameter), cover it with a lid, and dry in an oven at 80° C to yield a 5% R6g-co-doped film. Phosphorescent films with other R6g doping concentrations were prepared following the same method.

### **Computational Methods**

Geometry optimizations and frequency calculations were performed by using the density functional theory (DFT), and the time-dependent density functional theory (TD-DFT) was applied to study the low-lying excited states with the B3LYP functional and 6-31G(d) basis set. All above calculations were carried out with the Gaussian 16 B.01 package<sup>[1]</sup>. Gaussian calculation results were analyzed by Multiwfn 3.8<sup>[2, 3]</sup> and VMD 1.9.3 software<sup>[4]</sup>. The spin-orbit coupling (SOC) constants between singlet and triplet states were obtained using ORCA 4.2<sup>[5]</sup> with Gaussian-optimized structures and the B3LYP/6-31G(d) method.

## Supporting Figures

### BPCA

$^1\text{H}$  NMR (500 MHz, DMSO- $d_6$ )  $\delta$  13.05 (s, 1H), 8.03 (d,  $J$  = 8.2 Hz, 2H), 7.79 (d,  $J$  = 8.3 Hz, 2H), 7.73 (d,  $J$  = 7.6 Hz, 2H), 7.49 (s, 2H), 7.42 (t,  $J$  = 7.4 Hz, 1H). MS (BPCA) (m/z): [M-H]<sup>-</sup> cacl. for [C<sub>13</sub>H<sub>9</sub>O<sub>2</sub>]<sup>-</sup>, 197.06; found, 197.0605.

### BPAA

$^1\text{H}$  NMR (500 MHz, DMSO- $d_6$ )  $\delta$  12.40 (s, 1H), 7.65 (d,  $J$  = 7.8 Hz, 2H), 7.61 (d,  $J$  = 8.1 Hz, 2H), 7.46 (t,  $J$  = 7.7 Hz, 2H), 7.35 (d,  $J$  = 8.0 Hz, 3H), 3.62 (s, 2H). MS (BPAA) (m/z): [M-H]<sup>-</sup> cacl. for [C<sub>14</sub>H<sub>11</sub>O<sub>2</sub>]<sup>-</sup>, 211.07; found, 211.0763.

### D-BPAla

$^1\text{H}$  NMR (400 MHz, DMSO- $d_6$ )  $\delta$  8.57 (s, 2H), 7.67 – 7.60 (m, 4H), 7.45 (t,  $J$  = 7.6 Hz, 2H), 7.36 (dd,  $J$  = 17.5, 7.8 Hz, 3H), 4.17 (s, 1H), 3.20 (d,  $J$  = 6.3 Hz, 2H). MS (L-BPAla) (m/z): [M+H]<sup>+</sup> cacl. for [C<sub>15</sub>H<sub>16</sub>NO<sub>2</sub>]<sup>+</sup>, 242.11; found, 242.1182.

### L-BPAla

$^1\text{H}$  NMR (400 MHz, DMSO- $d_6$ )  $\delta$  8.62 – 8.51 (m, 2H), 7.67 – 7.61 (m, 4H), 7.46 (t,  $J$  = 7.6 Hz, 2H), 7.37 (dd,  $J$  = 16.9, 7.9 Hz, 3H), 4.18 (t,  $J$  = 6.3 Hz, 1H), 3.20 (s, 2H).. MS (L-BPAla) (m/z): [M+H]<sup>+</sup> cacl. for [C<sub>15</sub>H<sub>16</sub>NO<sub>2</sub>]<sup>+</sup>, 242.11; found, 242.1182.

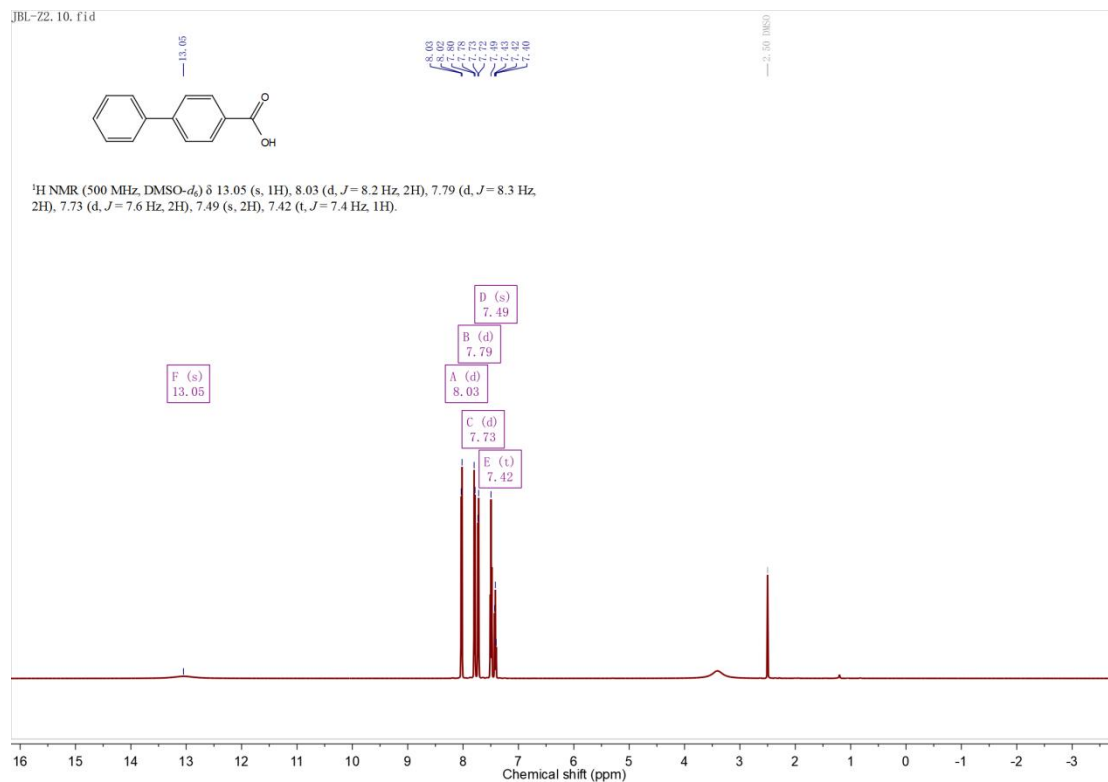

**Figure S1.**  $^1\text{H-NMR}$  spectra of BPCA

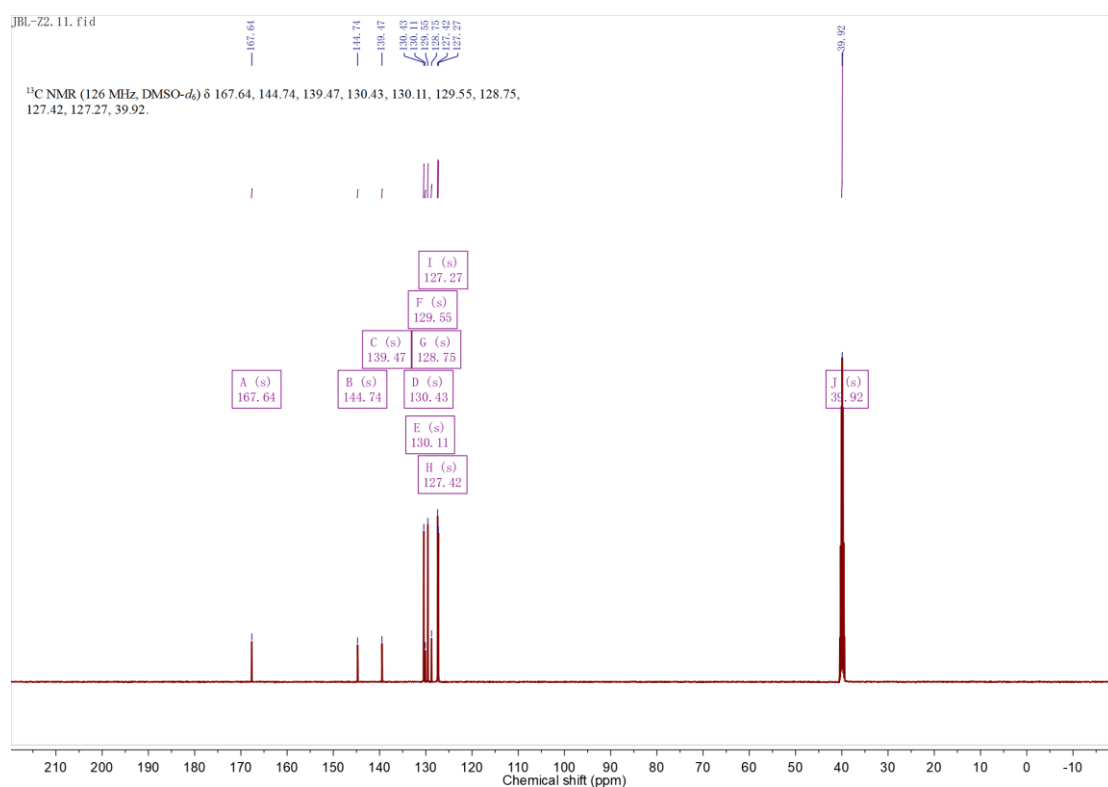

**Figure S2.**  $^{13}\text{C-NMR}$  spectra of BPCA



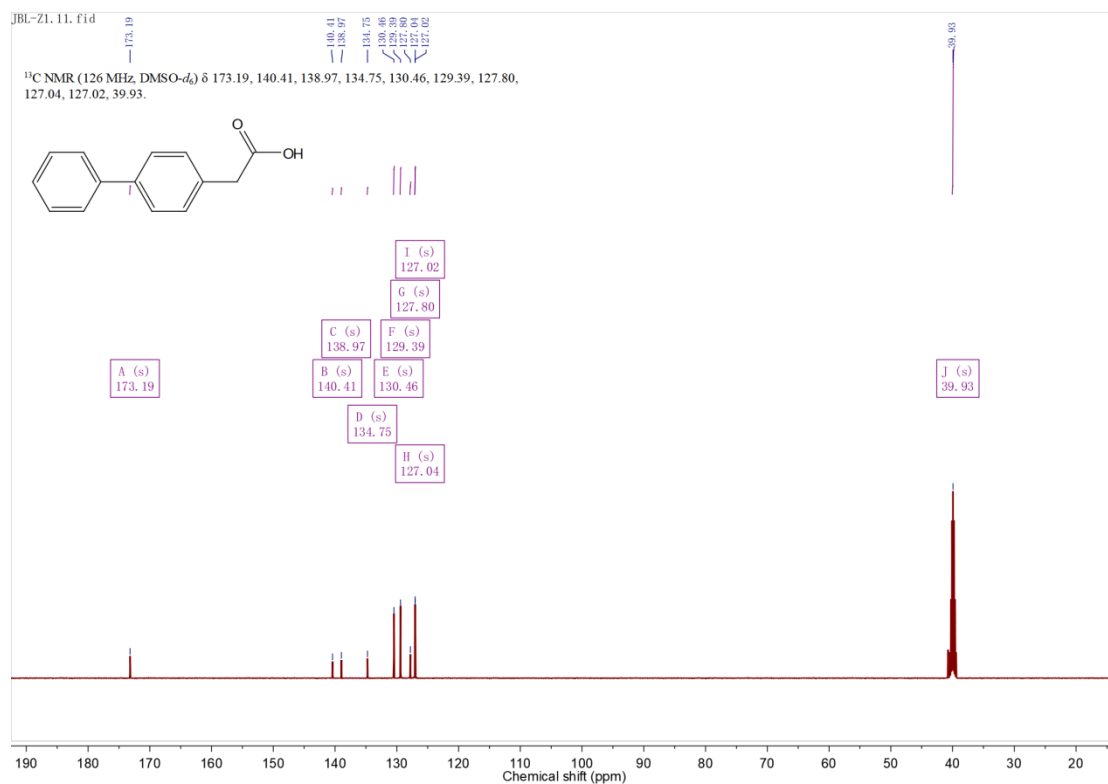

**Figure S5.** <sup>13</sup>C-NMR spectra of BPAA

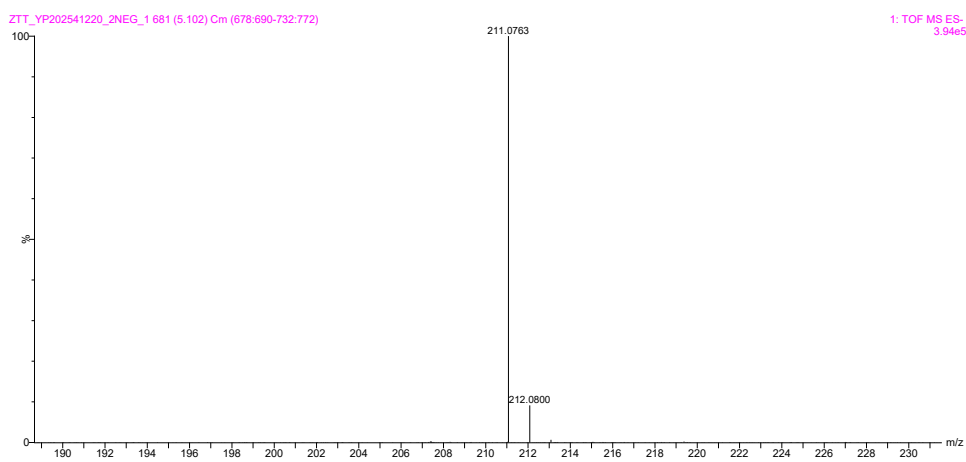

**Figure S6.** Time of Flight Mass Spectra of BPAA

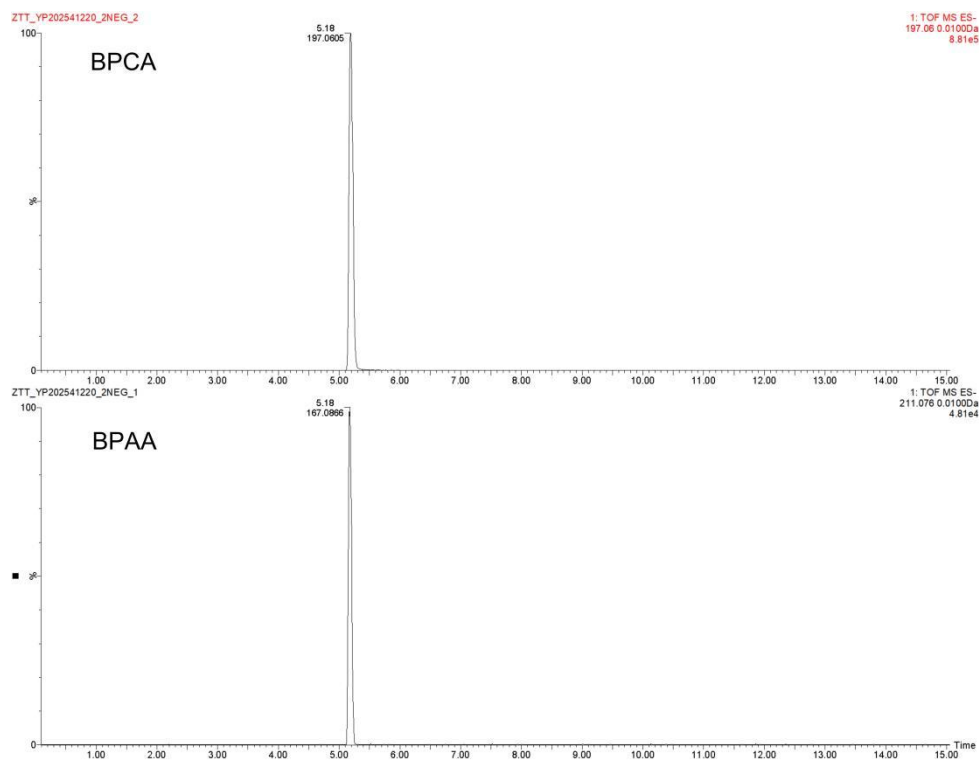

Figure S7. HPLC of BPCA and BPAA

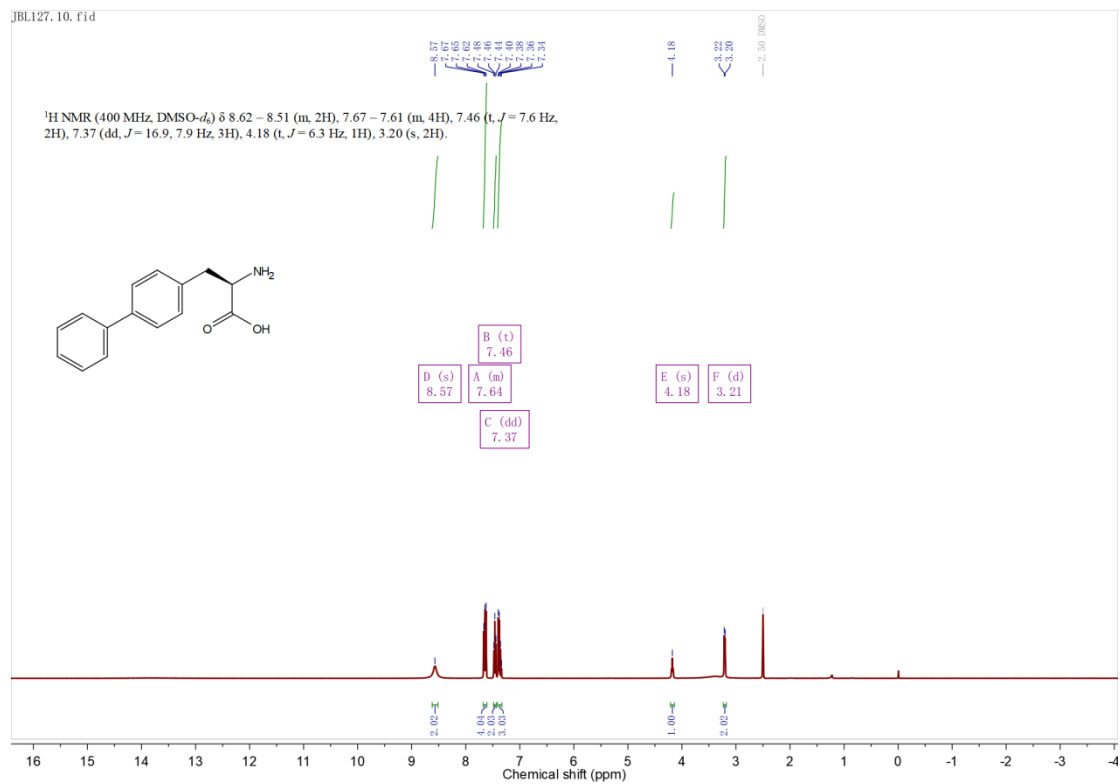

Figure S8  $^1\text{H-NMR}$  spectra of L-BPAla

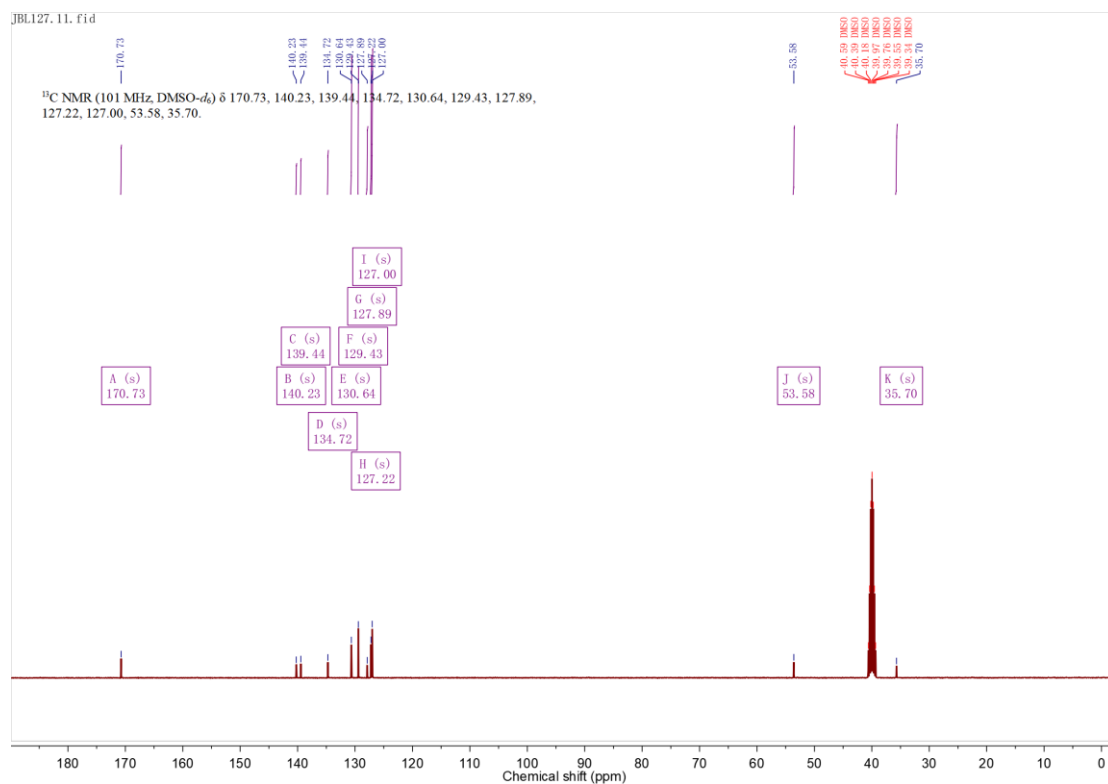

**Figure S9**  $^{13}\text{C}$ -NMR spectra of L-BPAla.

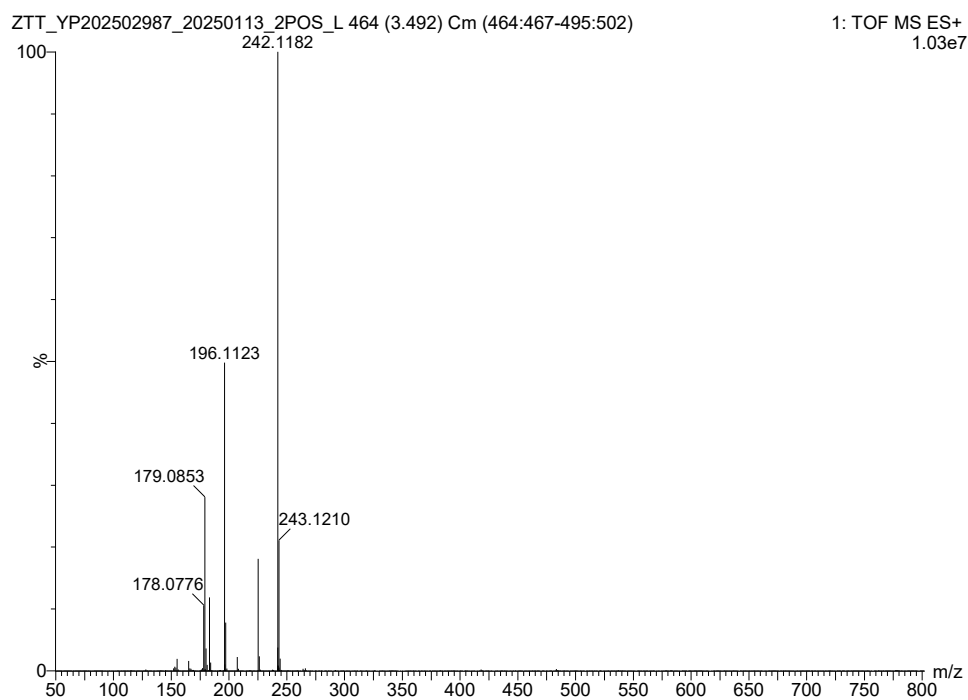

**Figure S10.** Time of Flight Mass Spectra of L-BPAla.

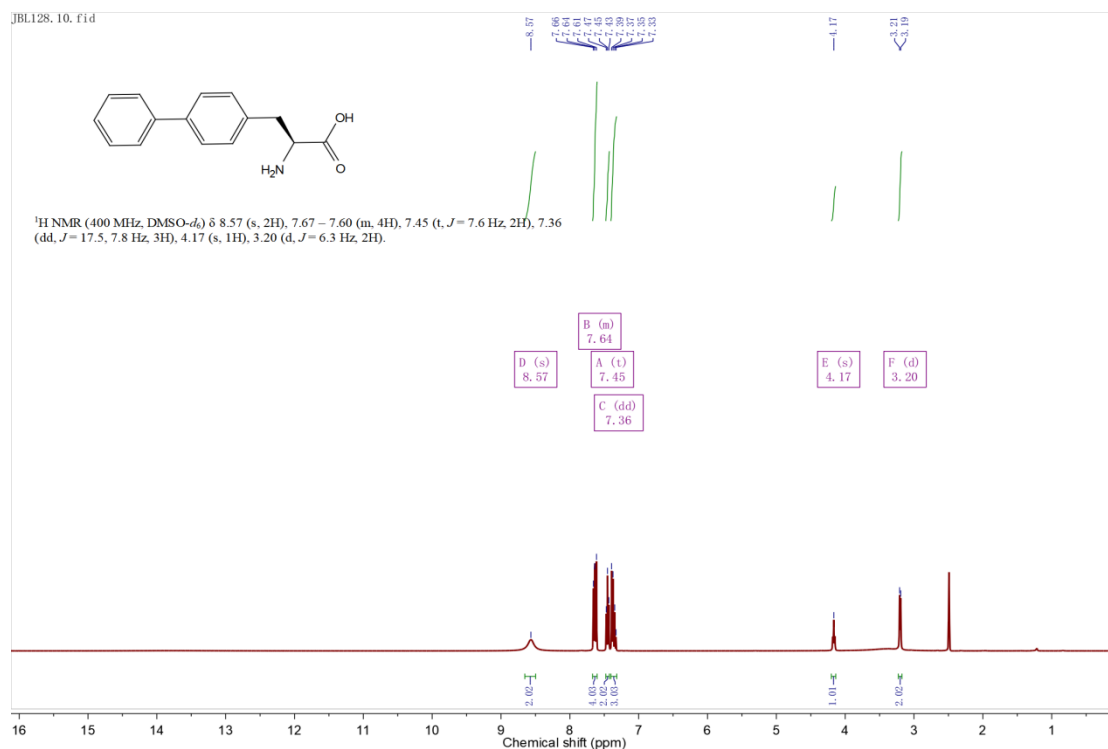

**Figure S11.** <sup>1</sup>H-NMR spectra of D-BPAla

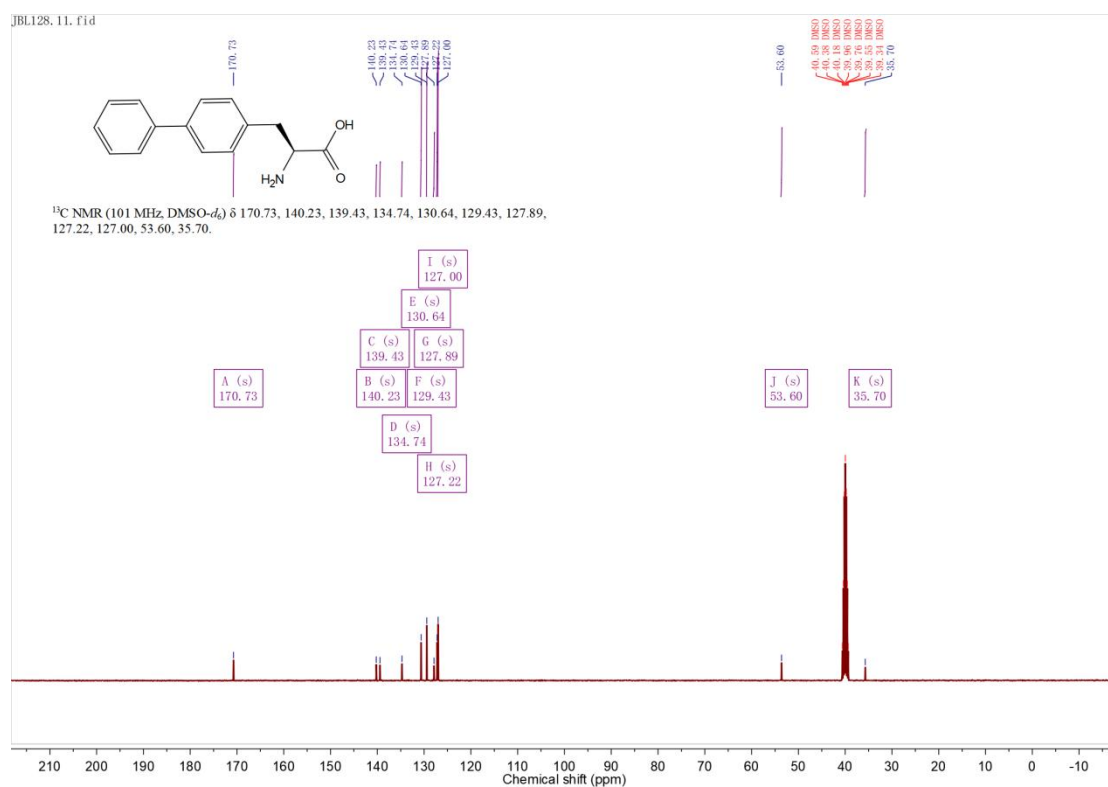

**Figure S12.** <sup>13</sup>C-NMR spectra of D-BPAla.

ZTT\_YP202502987\_20250113\_2POS\_D 465 (3.500) Cm (465:468-510:514)

1: TOF MS ES+  
7.99e6

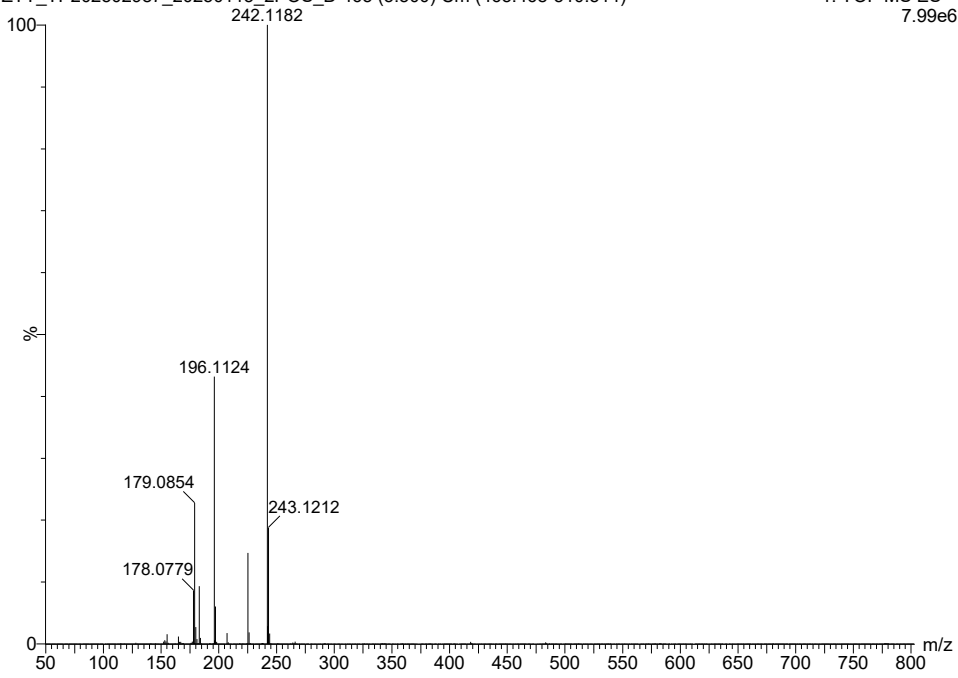

Figure S13. Time of Flight Mass Spectra of D-BPAIa.

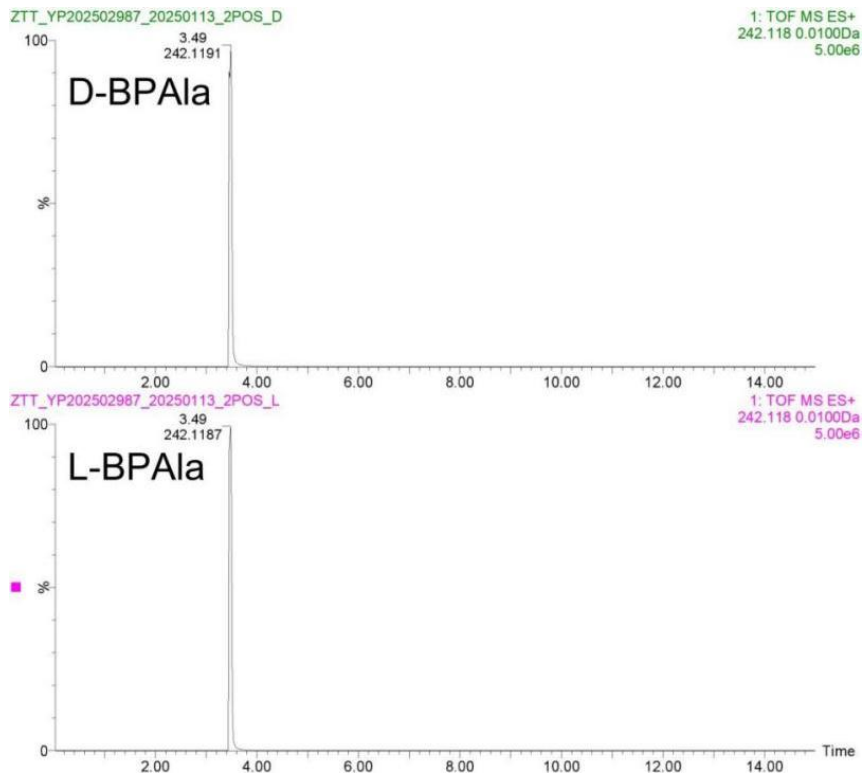

Figure S14. HPLC of D-BPAIa and L-BPAIa

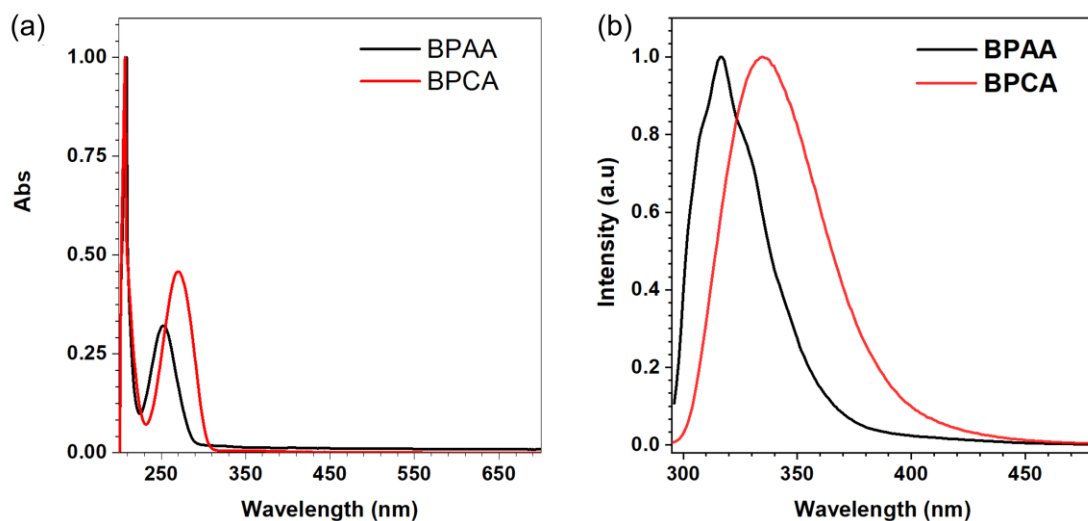

**Figure S15.** (a) UV-Vis spectrum and (b) photoluminescence emission spectra of BPCA and BPAA solution. Concentrations =  $1 \times 10^{-5}$  M, solvent is acetonitrile.

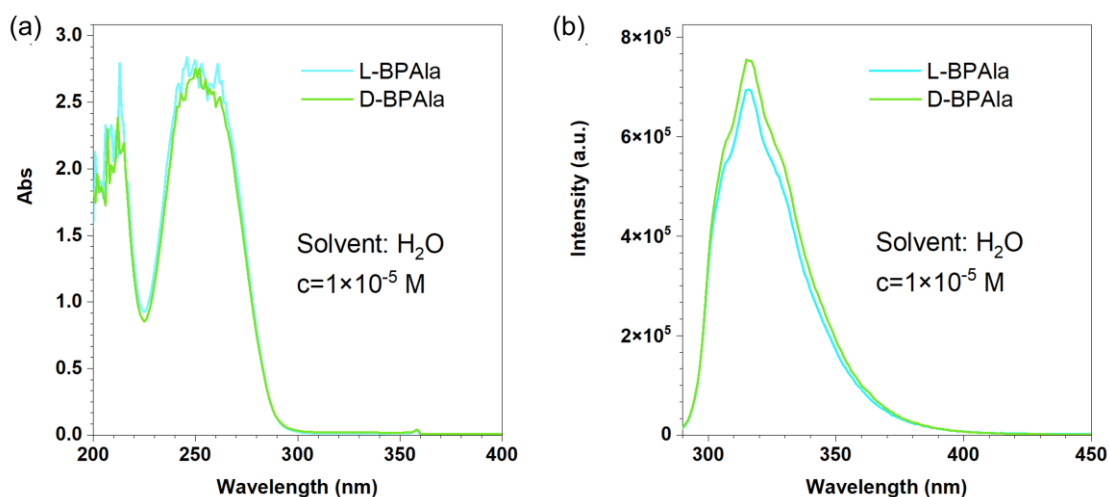

**Figure S16.** (a) UV-Vis spectrum and (b) photoluminescence emission spectra of L-BPAla and D-BPAla aqueous solution. Concentrations =  $1 \times 10^{-5}$  M.

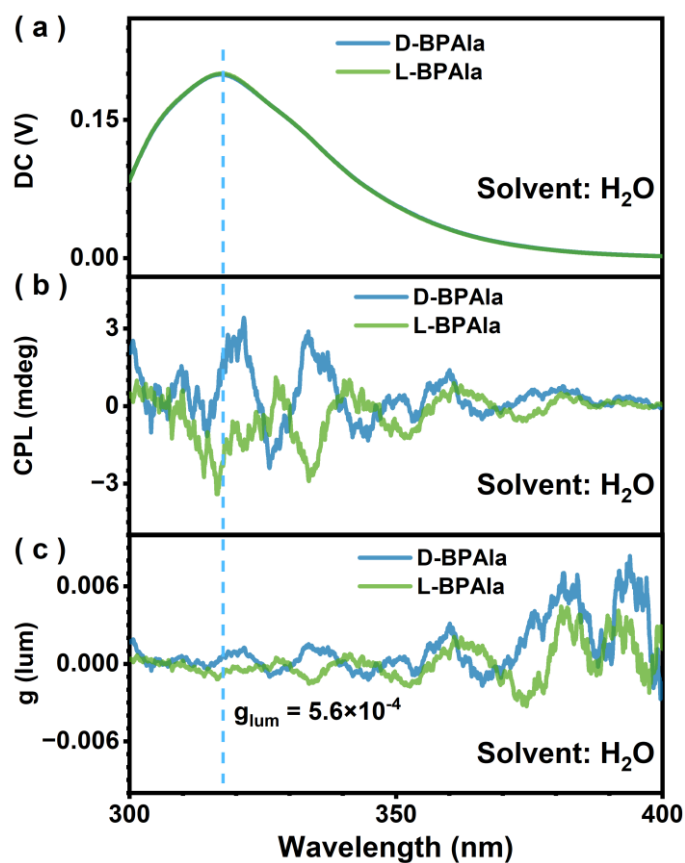

**Figure S17.** DC (a), CPL (b), g lum values-wavelength (c) of D-BPAIa and L-BPAIa aqueous solution. Concentrations =  $1 \times 10^{-5}$  M.

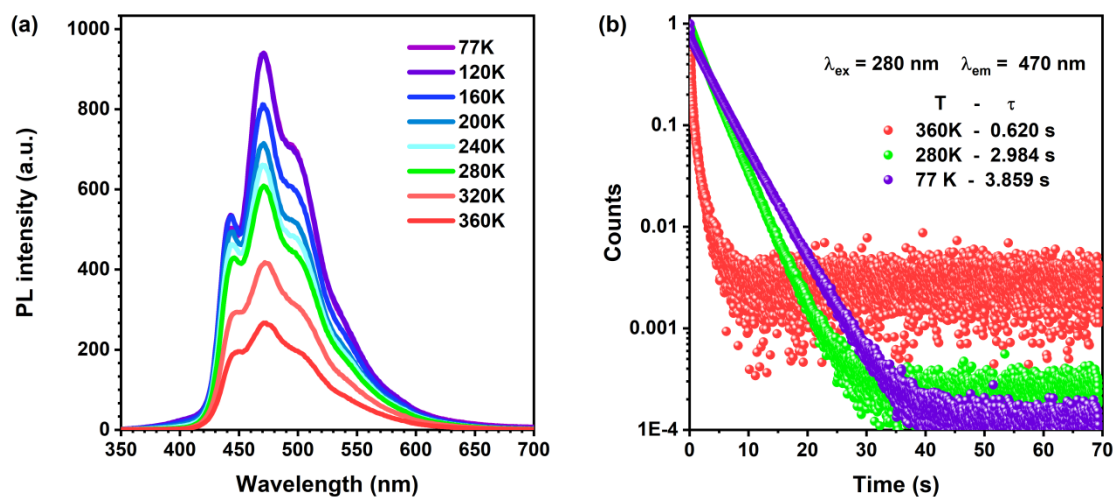

**Figure S18.** (a) Phosphorescence emission spectra of L-BPAIa@PVA film with different temperatures, (b) phosphorescence decay curves at 77 K, 280 K and 360 K,

$t_d = 1$  ms.

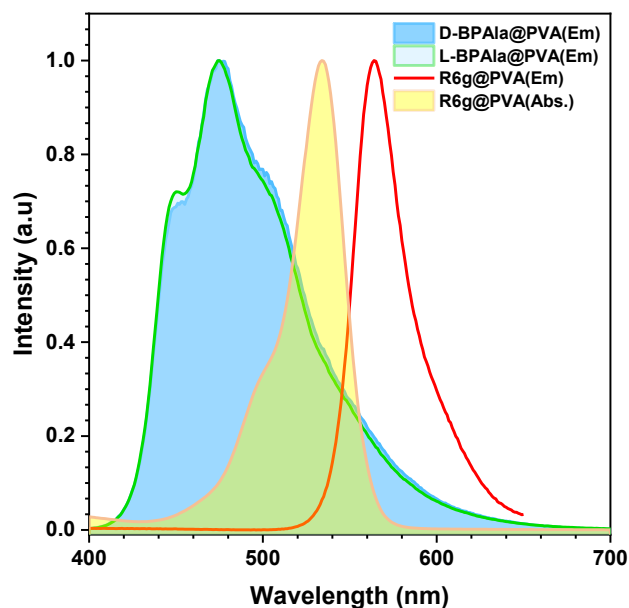

**Figure S19.** Phosphorescence emission spectra of 0.1 wt% D/L-BPAIa@PVA, fluorescence emission spectra and UV-Vis spectrum of 1 wt% R6g@PVA film. The spectral overlap ratios to be 36.17% and 36.83% between the emission spectra of D/L-BPAIa@PVA and the absorption spectrum of R6g, respectively.

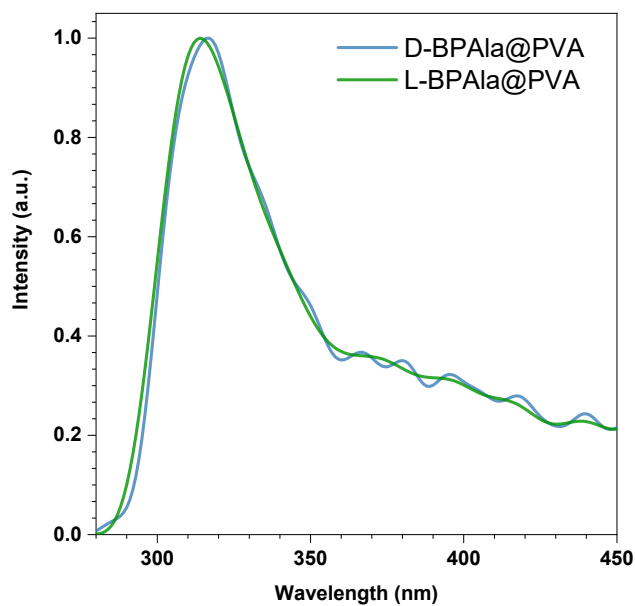

**Figure S20.** Photoluminescence emission spectra of D/L-BPAIa@PVA films

**Table S1.** Photophysical data of room temperature phosphorescence of PVA doped films.

| <b>Compound</b> | $E_{M_p}/\text{nm}$ | $\tau_p/\text{s}$ | $\Phi_p$ | CIE (x, y) |
|-----------------|---------------------|-------------------|----------|------------|
| BPCA            | 487                 | 1.06              | 23.48    | 0.18,0.32  |
| BPAA            | 478                 | 2.63              | 11.40    | 0.18,0.30  |
| D-BPAla         | 475                 | 2.91              | 7.91     | 0.17,0.26  |
| L-BPAla         | 475                 | 2.91              | 9.10     | 0.17,0.27  |

## 6 Theoretically calculated optimized molecular structures

### Cartesian coordinates of Compound BPCA in the ground state

|   |             |             |             |
|---|-------------|-------------|-------------|
| C | -4.02498900 | -1.13331800 | -0.44948300 |
| C | -2.63200800 | -1.12348500 | -0.45152600 |
| C | -1.92014000 | -0.00036700 | -0.00061000 |
| C | -2.64624800 | 1.11247600  | 0.45307700  |
| C | -4.03922000 | 1.10217000  | 0.45681700  |
| C | -4.73443600 | -0.02065500 | 0.00517200  |

|   |             |             |             |
|---|-------------|-------------|-------------|
| H | -4.55731000 | -2.00845200 | -0.81138500 |
| H | -2.08747200 | -1.98253900 | -0.83194100 |
| H | -2.11259500 | 1.97947300  | 0.83083300  |
| H | -4.58257700 | 1.96966100  | 0.82068300  |
| H | -5.82058600 | -0.02845200 | 0.00735600  |
| C | -0.43960100 | 0.01060400  | -0.00338300 |
| C | 0.27223900  | 1.18215400  | -0.31535100 |
| C | 0.29011000  | -1.14975900 | 0.30611400  |
| C | 1.66044600  | 1.19382800  | -0.31682500 |
| H | -0.27294500 | 2.08151200  | -0.58408400 |
| C | 1.67993700  | -1.14452400 | 0.30409600  |
| H | -0.24156600 | -2.05662300 | 0.57676100  |
| C | 2.37623300  | 0.03038100  | -0.00763100 |
| H | 2.21303400  | 2.09364200  | -0.56475500 |
| H | 2.23081800  | -2.04434300 | 0.55271200  |
| C | 3.85645900  | 0.09575000  | -0.02450500 |
| O | 4.50907600  | 1.08687900  | -0.28715700 |
| O | 4.44517900  | -1.08863100 | 0.28990200  |
| H | 5.40446600  | -0.92138800 | 0.24609500  |

**Cartesian coordinates of Compound BPCA in the first triplet state**

|   |             |             |             |
|---|-------------|-------------|-------------|
| C | -4.02136700 | -1.23273000 | -0.00033000 |
| C | -2.64752900 | -1.23478300 | -0.00024400 |
| C | -1.88214300 | -0.00022200 | 0.00004200  |
| C | -2.66644200 | 1.22237800  | 0.00017300  |
| C | -4.03994400 | 1.19922000  | 0.00009600  |
| C | -4.74706600 | -0.02233900 | -0.00014400 |
| H | -4.55610300 | -2.17845700 | -0.00056000 |
| H | -2.13013200 | -2.18516400 | -0.00049000 |
| H | -2.16324600 | 2.18032500  | 0.00040400  |
| H | -4.58914500 | 2.13660600  | 0.00022600  |
| H | -5.83201900 | -0.03065800 | -0.00019600 |
| C | -0.48169600 | 0.01149800  | 0.00019600  |
| C | 0.29505200  | 1.25685900  | 0.00010000  |
| C | 0.31345300  | -1.22301600 | 0.00038100  |
| C | 1.65203400  | 1.25884100  | -0.00001300 |
| H | -0.22370300 | 2.20687100  | 0.00004000  |
| C | 1.67207800  | -1.20925900 | 0.00029200  |
| H | -0.19241800 | -2.17996100 | 0.00070000  |
| C | 2.39747800  | 0.03032200  | 0.00003400  |
| H | 2.21253400  | 2.18704600  | -0.00013400 |
| H | 2.23026200  | -2.13827600 | 0.00044700  |

|   |            |             |             |
|---|------------|-------------|-------------|
| C | 3.85040300 | 0.09746700  | -0.00013200 |
| O | 4.50608300 | 1.13257600  | -0.00035400 |
| O | 4.45261400 | -1.13012700 | -0.00001800 |
| H | 5.40851800 | -0.94333700 | -0.00017100 |

### Cartesian coordinates of Compound BPAA in the ground state

|   |             |             |             |
|---|-------------|-------------|-------------|
| C | 4.32133300  | 1.12385100  | -0.69070200 |
| C | 2.94512000  | 1.13658100  | -0.47407000 |
| C | 2.28331600  | 0.00242800  | 0.02284600  |
| C | 3.04421200  | -1.14572800 | 0.29479200  |
| C | 4.42023800  | -1.15983900 | 0.07687900  |
| C | 5.06527000  | -0.02477400 | -0.41650100 |
| H | 4.81219000  | 2.01002000  | -1.08351200 |
| H | 2.36945700  | 2.02496500  | -0.71674100 |
| H | 2.55436700  | -2.02406600 | 0.70470500  |
| H | 4.99111800  | -2.05659200 | 0.30147000  |
| H | 6.13814300  | -0.03531500 | -0.58609000 |
| C | 0.82012600  | 0.01638600  | 0.25397100  |
| C | 0.03495200  | -1.11824300 | -0.00942400 |
| C | 0.17553800  | 1.16264800  | 0.74167900  |
| C | -1.33808400 | -1.10816100 | 0.21064100  |
| H | 0.50477100  | -2.00883900 | -0.41592900 |
| C | -1.20036600 | 1.17432500  | 0.95838600  |
| H | 0.76179500  | 2.04586000  | 0.97700800  |
| H | -1.93255900 | -1.98782700 | -0.01930400 |
| H | -1.67709200 | 2.07297600  | 1.34120600  |
| C | -4.20050000 | -0.13332900 | -0.38627500 |

|   |             |             |             |
|---|-------------|-------------|-------------|
| O | -4.46358300 | -1.19720900 | -0.90171100 |
| O | -4.48893200 | 1.05564800  | -0.96755400 |
| H | -4.90119200 | 0.84302500  | -1.82627600 |
| C | -1.97264400 | 0.03885800  | 0.70258800  |
| C | -3.47369600 | 0.04445400  | 0.93177700  |
| H | -3.78294600 | 0.98116900  | 1.40161800  |
| H | -3.76683500 | -0.78962000 | 1.57644100  |

**Cartesian coordinates of Compound BPAA in the first triplet state**

|   |             |             |             |
|---|-------------|-------------|-------------|
| C | -4.38746800 | -1.14289300 | -0.32646300 |
| C | -3.03491100 | -1.20610600 | -0.11921100 |
| C | -2.22312800 | 0.00060800  | 0.03360300  |
| C | -2.95780500 | 1.26200700  | -0.05201000 |
| C | -4.31103600 | 1.29465000  | -0.25982200 |
| C | -5.06104500 | 0.10088100  | -0.40254000 |
| H | -4.95396000 | -2.06398400 | -0.43499500 |
| H | -2.56051500 | -2.17761200 | -0.06859700 |
| H | -2.42389600 | 2.19769000  | 0.05252400  |
| H | -4.81889000 | 2.25377000  | -0.31652400 |
| H | -6.13246900 | 0.13896200  | -0.56795300 |
| C | -0.84780700 | -0.04842700 | 0.24739000  |
| C | -0.02810400 | 1.15971300  | 0.39613800  |
| C | -0.10813100 | -1.31407000 | 0.33915500  |
| C | 1.31451000  | 1.09636500  | 0.61893500  |
| H | -0.49631900 | 2.13280300  | 0.32362200  |
| C | 1.23774200  | -1.34683600 | 0.56193600  |
| H | -0.63885700 | -2.25076100 | 0.22908900  |
| H | 1.89226800  | 2.01250100  | 0.70794900  |
| H | 1.74949400  | -2.30432100 | 0.61882000  |
| C | 4.17015800  | 0.17789500  | -0.38583100 |

|   |            |             |             |
|---|------------|-------------|-------------|
| O | 4.47296300 | 1.29965100  | -0.72567300 |
| O | 4.34446400 | -0.90703500 | -1.17999200 |
| H | 4.71697200 | -0.57160900 | -2.01727900 |
| C | 1.99773900 | -0.15404700 | 0.72760600  |
| C | 3.48989900 | -0.19101100 | 0.92322900  |
| H | 3.81534900 | -1.18643600 | 1.23792200  |
| H | 3.80773700 | 0.54569000  | 1.66804800  |

**Cartesian coordinates of Compound D- BPAla in the ground state**

|   |             |             |             |
|---|-------------|-------------|-------------|
| O | -4.36651100 | 0.94645500  | -1.81777400 |
| O | -3.39623400 | 1.87338700  | -0.01098200 |
| N | -4.99538600 | -1.03189900 | 0.11543500  |
| C | -2.77010200 | -0.67963700 | 1.11947900  |
| C | -1.29219900 | -0.50451700 | 0.85561100  |
| C | -3.62560500 | -0.56466400 | -0.15082300 |
| C | 1.47260200  | -0.20100400 | 0.29791200  |
| C | -0.52224500 | -1.58550900 | 0.40806200  |
| C | -0.65790900 | 0.73204100  | 1.02108000  |
| C | 0.83396500  | -1.43989700 | 0.13261200  |
| C | 0.69921200  | 0.88009800  | 0.74780800  |
| C | 2.91675500  | -0.04172100 | 0.00888900  |
| C | -3.74972000 | 0.88442400  | -0.60955700 |
| C | 3.72346100  | 0.78971700  | 0.80224200  |
| C | 3.51562000  | -0.71799100 | -1.06607800 |
| C | 5.08144800  | 0.94079500  | 0.52976600  |
| C | 4.87397100  | -0.56938500 | -1.33808300 |
| C | 5.66344300  | 0.26137200  | -0.54152100 |
| H | -2.94649700 | -1.67662700 | 1.54319900  |
| H | -3.13245600 | 0.05133700  | 1.84682400  |
| H | -3.12545200 | -1.11452800 | -0.96722500 |

|   |             |             |             |
|---|-------------|-------------|-------------|
| H | -0.98923000 | -2.56111600 | 0.28838800  |
| H | -1.24318900 | 1.58707000  | 1.34169000  |
| H | 1.41396300  | -2.30214700 | -0.18319100 |
| H | 1.16226300  | 1.85617600  | 0.85940700  |
| H | -4.96186100 | -2.01305500 | 0.38732800  |
| H | -5.54058800 | -0.98361100 | -0.74341800 |
| H | 3.28443900  | 1.30026600  | 1.65428000  |
| H | 2.90279400  | -1.34428500 | -1.70777700 |
| H | 5.68835900  | 1.58360500  | 1.16152200  |
| H | 5.31479600  | -1.09631500 | -2.17995300 |
| H | 6.72237300  | 0.37831900  | -0.75370200 |
| H | -4.45623900 | 1.89473100  | -2.02976600 |

**Cartesian coordinates of Compound D- BPAla in the first triplet state**

|   |             |             |             |
|---|-------------|-------------|-------------|
| O | -4.37250100 | 1.08598400  | -1.74516500 |
| O | -3.32367200 | 1.85370400  | 0.09251400  |
| N | -5.00825600 | -1.02597900 | 0.01725500  |
| C | -2.78078200 | -0.77646300 | 1.05429600  |
| C | -1.31084800 | -0.57941800 | 0.82184300  |
| C | -3.63191700 | -0.55948900 | -0.21049800 |
| C | 1.51301500  | -0.22013600 | 0.28888300  |
| C | -0.52857400 | -1.61372100 | 0.22227200  |
| C | -0.64581200 | 0.63707200  | 1.15479700  |
| C | 0.80186800  | -1.46186100 | -0.03519400 |
| C | 0.68474700  | 0.81960000  | 0.91236400  |
| C | 2.86835800  | -0.04347100 | 0.02483600  |
| C | -3.72592200 | 0.92081000  | -0.56255400 |
| C | 3.57563500  | 1.19395100  | 0.35684500  |
| C | 3.68759100  | -1.08058200 | -0.60357900 |
| C | 4.91024400  | 1.35314800  | 0.09524400  |
| C | 5.02056000  | -0.89265700 | -0.85358600 |
| C | 5.66828000  | 0.32152900  | -0.51321800 |
| H | -2.96359400 | -1.80714500 | 1.39003700  |
| H | -3.15347100 | -0.10731000 | 1.83462800  |
| H | -3.13521300 | -1.05641800 | -1.06247300 |

|   |             |             |             |
|---|-------------|-------------|-------------|
| H | -1.01400000 | -2.55534700 | -0.02788500 |
| H | -1.22933200 | 1.43836600  | 1.59570800  |
| H | 1.34358400  | -2.28545500 | -0.48243400 |
| H | 1.13577300  | 1.76449900  | 1.18657600  |
| H | -4.98990000 | -2.02546200 | 0.21315900  |
| H | -5.55103700 | -0.90321200 | -0.83564300 |
| H | 3.03435200  | 2.00740600  | 0.82242600  |
| H | 3.23285100  | -2.02260800 | -0.88217500 |
| H | 5.39751700  | 2.28825200  | 0.35880000  |
| H | 5.59286400  | -1.68901600 | -1.32226700 |
| H | 6.72514200  | 0.45893900  | -0.71562400 |
| H | -4.43702200 | 2.04898800  | -1.88891400 |

**Cartesian coordinates of Compound L- BPAIa in the ground state**

|   |             |             |             |
|---|-------------|-------------|-------------|
| O | 2.68557900  | 1.04544600  | -1.78226200 |
| O | 3.85076000  | 1.87516800  | -0.04079900 |
| N | 5.17743600  | -0.65077700 | -0.14176800 |
| C | 2.90290900  | -0.85890400 | 0.96909000  |
| C | 1.41779000  | -0.67380700 | 0.78361200  |
| C | 3.73118200  | -0.52049600 | -0.30454300 |
| C | -1.35005600 | -0.27538600 | 0.31494500  |
| C | 0.79990800  | 0.53923500  | 1.11149800  |
| C | 0.63087700  | -1.68356400 | 0.21783400  |

|   |             |             |             |
|---|-------------|-------------|-------------|
| C | -0.55865500 | 0.73553900  | 0.88165800  |
| C | -0.72784700 | -1.49062000 | -0.01169100 |
| C | -2.79643500 | -0.06812400 | 0.07129400  |
| C | 3.45313900  | 0.92538600  | -0.68275400 |
| C | -3.58209600 | 0.66482800  | 0.97509200  |
| C | -3.41747500 | -0.59873400 | -1.07072200 |
| C | -4.94200900 | 0.86162600  | 0.74463700  |
| C | -4.77772800 | -0.40418600 | -1.30093500 |
| C | -5.54636600 | 0.32749900  | -0.39439100 |
| H | 3.27028700  | -0.21938500 | 1.77978500  |
| H | 3.12908700  | -1.89823400 | 1.23845100  |
| H | 3.40399800  | -1.16621400 | -1.12478000 |
| H | 1.39628900  | 1.34240200  | 1.53666300  |
| H | 1.08656500  | -2.63838000 | -0.03497500 |
| H | -1.00965200 | 1.69355900  | 1.12316400  |
| H | -1.32291400 | -2.30051100 | -0.42318100 |
| H | 5.39630500  | -1.56218500 | 0.25674900  |
| H | 5.49111700  | 0.05325200  | 0.52562100  |
| H | -3.12571200 | 1.05987900  | 1.87793300  |
| H | -2.82087000 | -1.14517500 | -1.79529200 |
| H | -5.53284600 | 1.42548400  | 1.46126100  |
| H | -5.23629700 | -0.81707100 | -2.19526500 |

|   |             |            |             |
|---|-------------|------------|-------------|
| H | -6.60676500 | 0.48002800 | -0.57393200 |
| H | 2.52581100  | 2.00132400 | -1.90307200 |

**Cartesian coordinates of Compound L- BPAla in the first triplet state**

|   |             |             |             |
|---|-------------|-------------|-------------|
| O | -2.59024900 | 1.10627600  | 1.70305400  |
| O | -3.86570400 | 1.87316500  | 0.00967500  |
| N | -5.17896900 | -0.63524000 | 0.21825700  |
| C | -2.91502900 | -0.91733500 | -0.90928700 |
| C | -1.43856700 | -0.72917400 | -0.76417400 |
| C | -3.73393600 | -0.50950000 | 0.36399100  |
| C | 1.38751200  | -0.28726000 | -0.31597100 |
| C | -0.80764700 | 0.49041100  | -1.15617500 |
| C | -0.62124200 | -1.72289800 | -0.14624600 |
| C | 0.52304300  | 0.71182700  | -0.95619100 |
| C | 0.71169800  | -1.53247800 | 0.06827600  |
| C | 2.74408500  | -0.06995800 | -0.08887500 |
| C | -3.43224700 | 0.94830500  | 0.66454300  |
| C | 3.41434100  | 1.17024700  | -0.47867600 |
| C | 3.60006500  | -1.06553700 | 0.55551200  |
| C | 4.75080400  | 1.36821300  | -0.25409900 |
| C | 4.93411700  | -0.83962600 | 0.76766400  |
| C | 5.54562700  | 0.37550300  | 0.37092500  |
| H | -3.30146500 | -0.31817300 | -1.74257900 |

|   |             |             |             |
|---|-------------|-------------|-------------|
| H | -3.15453500 | -1.96944800 | -1.11353100 |
| H | -3.40049900 | -1.12070200 | 1.20741100  |
| H | -1.41550600 | 1.26109400  | -1.62424000 |
| H | -1.08135300 | -2.66159600 | 0.15560000  |
| H | 0.94791400  | 1.65223300  | -1.28287200 |
| H | 1.28270600  | -2.32644200 | 0.53201600  |
| H | -5.41229300 | -1.55680600 | -0.14656900 |
| H | -5.49829600 | 0.05303900  | -0.46242500 |
| H | 2.84466600  | 1.95548900  | -0.95879200 |
| H | 3.17335900  | -2.00677500 | 0.87748100  |
| H | 5.21020900  | 2.30425300  | -0.56070800 |
| H | 5.53464500  | -1.60629900 | 1.25016100  |
| H | 6.60333400  | 0.54334900  | 0.54370000  |
| H | -2.40823100 | 2.06348200  | 1.76840900  |

## REFERENCES

1. Frisch, M. J.; Trucks, G. W.; Schlegel, H. B.; Scuseria, G. E.; Robb, M. A.; Cheeseman, J. R.; Scalmani, G.; Barone, V.; Petersson, G. A.; Nakatsuji, H.; Li, X.; Caricato, M.; Marenich, A. V.; Bloino, J.; Janesko, B. G.; Gomperts, R.; Mennucci, B.; Hratchian, H. P.; Ortiz, J. V.; Izmaylov, A. F.; Sonnenberg, J. L.; Williams; Ding, F.; Lipparini, F.; Egidi, F.; Goings, J.; Peng, B.; Petrone, A.; Henderson, T.; Ranasinghe, D.; Zakrzewski, V. G.; Gao, J.; Rega, N.; Zheng, G.; Liang, W.; Hada, M.; Ehara, M.; Toyota, K.; Fukuda, R.; Hasegawa, J.; Ishida, M.; Nakajima, T.; Honda, Y.; Kitao, O.; Nakai, H.; Vreven, T.; Throssell, K.; Montgomery Jr., J. A.; Peralta, J. E.; Ogliaro, F.; Bearpark, M. J.; Heyd, J. J.; Brothers, E. N.; Kudin, K. N.; Staroverov, V. N.; Keith, T. A.; Kobayashi, R.; Normand, J.; Raghavachari, K.; Rendell, A. P.; Burant, J. C.;

Iyengar, S. S.; Tomasi, J.; Cossi, M.; Millam, J. M.; Klene, M.; Adamo, C.; Cammi, R.; Ochterski, J. W.; Martin, R. L.; Morokuma, K.; Farkas, O.; Foresman, J. B.; Fox, D. J. *Gaussian 16 Rev. B.01*, Wallingford, CT, **2016**.

2. Lu, T.; Chen, F., *J. Comput. Chem.* **2012**, *33* (5), 580-592.

3. Lu, T., *J. Chem. Phys.* **2024**, *161* (8).

4. Humphrey, W.; Dalke, A.; Schulten, K., *J. Mol. Graphics* **1996**, *14* (1), 33-38.

5. Neese, F.; Wennmohs, F.; Becker, U.; Riplinger, C., *J. Chem. Phys.* **2020**, *152* (22).
